# Supplementary material for: Sociodemographic and psychosocial factors associated with vaccine hesitancy – results from a longitudinal study in Singapore
Source: PubMed Central journal article supplement — Hum Vaccin Immunother. 2023 Jul 25;19(2):2235964. doi: 10.1080/21645515.2023.2235964 (PMC10392729; doi:10.1080/21645515.2023.2235964), 2023-07-25
Supplement: KHVI_A_2235964_SM5872.pdf [file KHVI_A_2235964_SM5872.pdf]

Table 1 Supplementary Factor loadings, goodness of fit indices and Cronbach alpha of the Vaccine Hesitancy Scale

| Question                                                                          | Lack of confidence | Risks    |
|-----------------------------------------------------------------------------------|--------------------|----------|
|                                                                                   | Loadings           | Loadings |
| 1. Vaccines are important for my health.                                          | 0.924              |          |
| 2. Vaccines are effective                                                         | 0.843              |          |
| 3. Vaccines are important for the health of others in my community                | 0.952              |          |
| 4. All vaccines offered by the government program in my community are beneficial  | 0.918              |          |
| 5. New vaccines carry more risks than older vaccines                              |                    | 0.373    |
| 6. The information I receive about vaccines from the program is reliable          | 0.833              |          |
| 7. Getting vaccines is a good way to protect myself from diseases                 | 0.907              |          |
| 8. Generally I do what my doctor or healthcare provider recommends about vaccines | 0.797              |          |
| 9. I am concerned about serious adverse effects about vaccines                    |                    | 0.549    |
| 10. Vaccines cause diseases                                                       |                    | 0.674    |
| 11. Government over hypes the need for vaccines                                   |                    | 0.623    |
| 12. Corporations manufacturing vaccines only care for profit                      |                    | 0.590    |
| 13. I am uncomfortable getting a vaccine that was rushed into production          |                    | 0.610    |

|                                                           |        |         |
|-----------------------------------------------------------|--------|---------|
| 14. I feel uncomfortable getting vaccinated               |        | 0.901   |
| <b>Correlation coefficient between two latent factors</b> | -0.757 |         |
| <b>Goodness of fit indices of derived from CFA</b>        |        |         |
| Chi-Square Test of Model Fit                              |        | 246.972 |
| Degrees of Freedom                                        |        | 76      |
| RMSEA                                                     |        | 0.051   |
| CFI                                                       | 0.985  |         |
| SRMR                                                      | 0.040  |         |
| TLI                                                       | 0.982  |         |

---
